# Supplementary material
Source: publisher figshare collection journal article supplement (https://diabetesjournals.figshare.com/ndownloader/files/24445871)
Supplement: Supplementary file 1 [file 24445871]

## Sheet: Sheet1
gene name	forward primer sequence	reverse primer sequence
RPLP0	GAAACTGCTGCCTCACATCCG	GCTGGCACAGTGACCTCACACG
IR	AAATGCAGGAACTCTCGGAAGCCT	ACCTTCGAGGATTTGGCAGACCTT
CCL2	CCCAATGAGTAGGCTGGAGA	TCTGGACCCATTCCTTCTTG
TNFα	CCACCACGCTCTTCTGTCTA	GTGGGTGAGGAGCACGTAGT
F4/80	GGTTTGAGCTCAGCAAGGAG	CCTCTGGCTGCCAAGTTAAT
IL1b	CAGGCAGGCAGTATCACTCA	AGCTCATATGGGTCCGACAG
adipoQ	GGAACTTGTGCAGGTTGGAT	GCTTCTCCAGGCTCTCCTTT
leptin	TTCACACACGCAGTCGGTAT	ACATTTTGGGAAGGCAGGCT
FASN	GGTTACACTGTGCTAGGTGTTG	TCCAGGCGCATGAGGCTCAGC
SCD1	GCTGGAGTACGTCTGGAGGAA	TCCCGAAGAGGCAGGTGTAG
DGAT1	gctctggcatcatactccatc	cggtaggtcaggttgtctgg
DGAT2	tactccaagcccatcaccac	cagttcacctccagcacctc
HSL	GAGACACCAGCCAACGGATAC	TTTTGCGGTTAGAAGCCACAT
ATGL	AGGAATGGCCTACTGAACCAAC	AAGGCTGCAATTGATCCTCCTC
CD36	TTAGATGTGGAACCCATAACTGGA	TTGACCAATATGTTGACCTGCAG
Acox1	GCCTGCTGTGTGGGTATGTCATT	GTCATGGGCGGGTGCAT
CPT1α	GAGAAATACCCTGACTATGTG	TGTGAGTCTGTCTCAGGGCTAG
LCAD	GTCCGATTGCCAGCTAATGC	AGGCAGAAATCGCCAACTCA
MCAD	GAAGCCACGAAGTATGCCCT	CCTTCATCGCCATTTCTGCG
VLCAD	ATGGGAGAAGCAGGCAAACA	CTCTGGGTGGACAATCCCTG
FGF21	CTCCAGCAGCAGTTCTCTGA	CCTGGGTGTCAAAGCCTCTA
Col1A	TTGATCCAGAAGGACCTTGTTTG	CCTCAGGGTATTGCTGGACAA
TGFb1	AAGTTGGCATGGTAGCCCTT	GCCCTGGATACCAACTATTGC
FSP27	TCGGAAGGTTCGCAAAGGCATC	CTCCACGATTGTGCCATCTTCC
SREBP1c	GAGCCATGGATTGCACATTT	CTCAGGAGAGTTGGCACCTG
G6Pase	GTGTCCAGGACCCACCAATA	ACTGTGGGCATCAATCTCCT
PEPCK	TGTCTTCACTGAGGTGCCAG	CTGGATGAAGTTTGATGCCC
VLDLR	ACGGCAGCGATGAGGTCAACTG	CAGAGCCATCAACACAGTCTCG
LPL	GCGTAGCAGGAAGTCTGACCAA	AGCGTCATCAGGAGAAAGGCGA
IL6	TACCACTTCACAAGTCGGAGGC	CTGCAAGTGCATCATCGTTGTTC
